# Supplementary material for: Prevalence of Mutations in Discoidin Domain-Containing Receptor Tyrosine Kinase 2 (DDR2) in Squamous Cell Lung Cancers in Korean Patients
Source: PubMed Central journal article supplement — Cancer Res Treat. 2017 Jan 25;49(4):1065–76. doi: 10.4143/crt.2016.347 (PMC5654160; doi:10.4143/crt.2016.347), 2017-01-25
Supplement: crt-2016-347-suppl.pdf [file crt-2016-347-suppl.pdf]

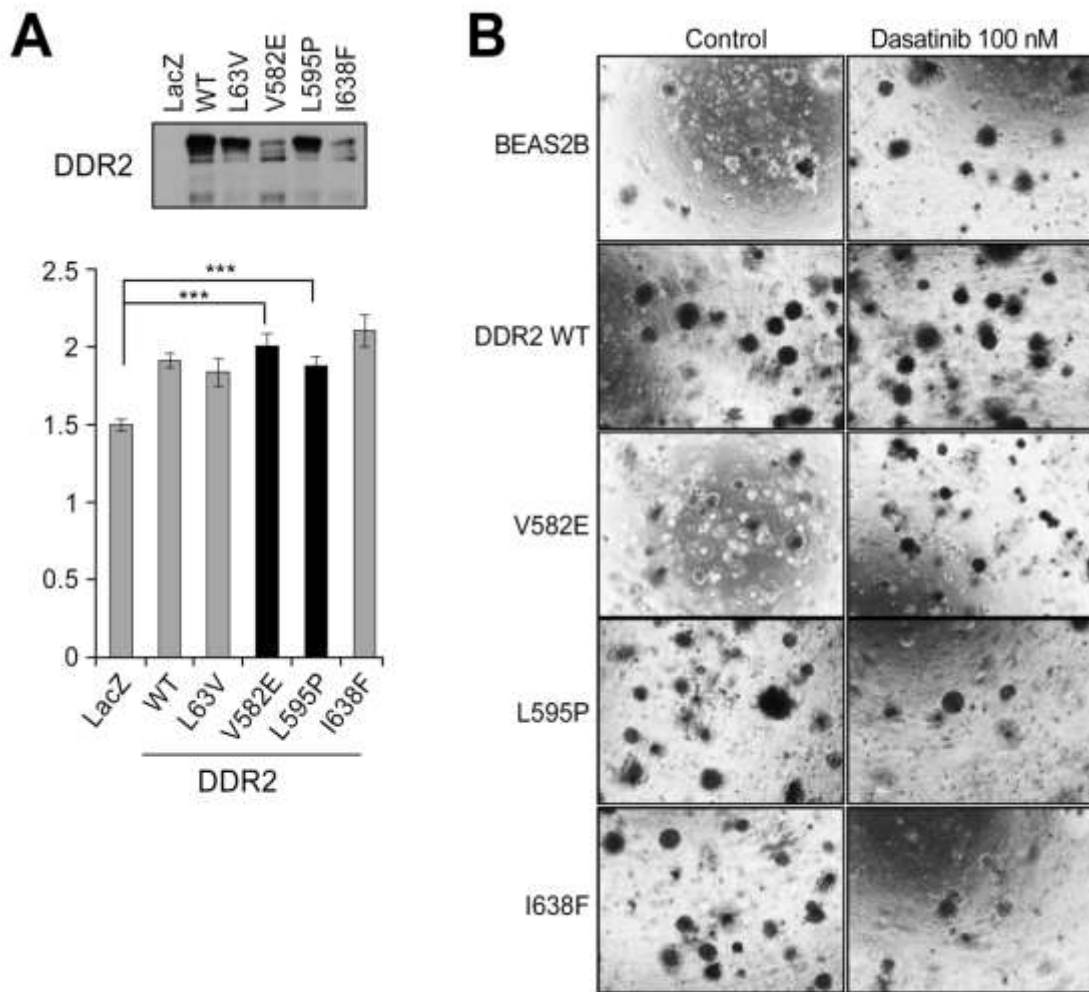

**S1 Fig.** Validation of enhanced tumorigenic activities in BEAS-2B cells expressing discoidin domain-containing receptor tyrosine kinase 2 (*DDR2*) mutants. (A) Overexpression of *DDR2* mutants was correlated with enhanced cell growth. *DDR2* expression of BEAS-2B cells harboring *DDR2* point mutants was confirmed using immunoblot analysis. Cells were seeded onto 96-well plates and cultured for 5 days, after which the absorbance was measured at 450 nm using a WST solution. The values shown represent the average of three independent experiments and error bars indicate standard deviations. \*\*\*  $p < 0.001$ . (B) The effects of dasatinib in BEAS-2B cells expressing *DDR2* mutants. BEAS-2B cells stably expressing *DDR2* mutants were embedded in Matrigel and cultured with or without 0.1  $\mu$ M dasatinib. The media was changed on alternate days. After 7 days, images were obtained from a phase-contrast microscope at 40 $\times$  magnification.
